# Supplementary material for: Efficiency of the Adjusted Binary Classification (ABC) Approach in Osteometric Sex Estimation: A Comparative Study of Different Linear Machine Learning Algorithms and Training Sample Sizes
Source: Biology (Basel). 2022 Jun 15;11(6):917. doi: 10.3390/biology11060917 (PMC9220275; doi:10.3390/biology11060917)
Supplement: Supplementary file 1 [file biology-11-00917-s001.zip › Spreadsheet of the performance indicators at each sample size of the training data using the different classification techniques..xlsx]

## Sheet: samples
method	n	pp_m	mm_f	classified_m	classified_f	classified	Sensitivity	Specificity	PPV	NPV	Accuracy	Variables used
LR	240	0.734	0.778	90	90	90	0.962963	1	1	0.964286	0.981481	LR100 FVDN + FEB + FNAL + MLD
LR	228	0.825	0.92	80	76.6667	78.3333	0.958333	1	1	0.958333	0.978723	LR95 FVDN + FEB + FNAL + MLD + MTD
LR	216	0.866	0.862	86.6667	90	88.3333	0.961538	1	1	0.964286	0.981132	LR90 FVDN + FEB + FNAL + MTD + MLD + FML + VHD
LR	204	0.837	0.875	83.3333	93.3333	88.3333	0.96	1	1	0.965517	0.981132	LR85 FEB + FVDN + MTD + FML + FNAL + VHD + FBL
LR	192	0.797	0.82	86.6667	93.3333	90	0.961538	1	1	0.965517	0.981481	LR80 FEB + FVDN + MTD + FNAL
LR	180	0.825	0.8	86.6667	90	88.3333	0.923077	1	1	0.931034	0.962264	LR75 FEB + FVDN + FNAL + MTD + FML + FTL + FBL
LR	168	0.935	0.831	70	93.3333	81.6667	0.952381	1	1	0.965517	0.979592	LR70 FEB + FVDN + MTD + FNAL + VHD
LR	156	0.733	0.817	90	96.6667	93.3333	0.962963	0.931034	0.928571	0.964286	0.946429	LR65 FEB + FVDN + FTL + FNAL + MLD
LR	144	0.793	0.898	90	96.6667	93.3333	0.962963	0.931034	0.928571	0.964286	0.946429	LR60 FEB + FNAL + FVDN + FTL + MLD + FML
LR	132	0.825	0.869	80	86.6667	83.3333	1	1	1	1	1	LR55 APDMC + VHD + FTL + MTD + FBP
LR	120	1	1	0	0	0	NA	NA	NA	NA	NA	LR50 FEB + FVDN + MTD + FTL + FBCB + FNAL + MLD + FML + APDMC
LR	108	0.97	1	73.3333	0	36.6667	1	NA	NA	NA	1	LR45 MTD + FVDN + FEB + FBCB + VHD + FNAL
LR	96	0.99	0.767	66.6667	90	78.3333	0.95	0.962963	0.95	0.962963	0.957447	LR40 MTD + FVDN + FBP + FEB + APDMC
LR	84	1	1	0	0	0	NA	NA	NA	NA	NA	LR35 FNAL + FTL + MTD + FVDN + FEB + APDLC
LR	72	0.91	0.745	80	86.6667	83.3333	0.916667	1	1	0.928571	0.96	LR30 FEB + FTL + FNAL
LR	60	1	1	0	0	0	NA	NA	NA	NA	NA	LR25 FEB + FTL + FNAL
LR	48	1	1	0	0	0	NA	NA	NA	NA	NA	LR20 APDMC + VHD + FTL + APDLC + FBCB + FEB + MTD + FVDN
LR	36	0.972	1	80	0	40	1	NA	NA	NA	1	LR15 VHD + APDMC
LR	24	0.896	0.937	10	23.3333	16.6667	0.666667	1	1	0.875	0.9	L10 MLD + MTD
LDA	240	0.726	0.867	86.6667	93.3333	90	0.961538	1	1	0.965517	0.981481	LDA100 FEB + VHD + FVDN + FBCB + FNAL
LDA	228	0.711	0.854	83.3333	93.3333	88.3333	0.96	1	1	0.965517	0.981132	LDA95 FEB + VHD + FVDN + FBCB + FNAL + FBP + APDLC
LDA	216	0.641	0.824	93.3333	96.6667	95	0.964286	0.965517	0.964286	0.965517	0.964912	LDA90 FEB + VHD + FVDN + FNAL
LDA	204	0.722	0.862	86.6667	96.6667	91.6667	0.961538	0.965517	0.961538	0.965517	0.963636	LDA85 FEB + VHD + FVDN + FBCB + FNAL
LDA	192	0.605	0.872	93.3333	96.6667	95	0.964286	0.965517	0.964286	0.965517	0.964912	LDA80 FEB + VHD + FVDN + FBP + FNAL + FBCB + APDLC
LDA	180	0.55	0.828	93.3333	96.6667	95	0.964286	0.965517	0.964286	0.965517	0.964912	LDA75 FEB + VHD + FVDN + FBP + FNAL + FBCB + APDLC
LDA	168	0.792	0.889	80	93.3333	86.6667	0.958333	1	1	0.965517	0.980769	LDA70 FEB + VHD + FVDN + FBP + FNAL + FBCB + APDLC
LDA	156	0.521	0.795	93.3333	96.6667	95	0.964286	0.965517	0.964286	0.965517	0.964912	LDA65 FEB + VHD + FVDN + FBP + FNAL + FBCB + APDLC
LDA	144	0.615	0.825	93.3333	96.6667	95	0.964286	0.965517	0.964286	0.965517	0.964912	LDA60 FEB + VHD + FVDN + FBCB + FNAL + FBP
LDA	132	0.599	0.843	93.3333	93.3333	93.3333	0.964286	0.964286	0.964286	0.964286	0.964286	LDA55 FEB + VHD + FVDN
LDA	120	0.995	0.879	23.3333	83.3333	53.3333	0.857143	1	1	0.961538	0.96875	LDA50 FEB + VHD + FVDN
LDA	108	0.999	0.958	0	66.6667	33.3333	NA	1	NA	NA	1	LDA45 FEB + VHD + FVDN + FBCB
LDA	96	0.999	0.949	0	66.6667	33.3333	NA	1	NA	NA	1	LDA40 FEB + VHD + FVDN + FNAL + FBP
LDA	84	1	0.921	0	73.3333	36.6667	NA	1	NA	NA	1	LDA35 FEB + VHD + FBP + FVDN
LDA	72	0.757	0.953	80	70	75	1	0.952381	0.96	1	0.977778	LDA30 FEB + VHD + FVDN + APDLC
LDA	60	0.684	0.888	90	93.3333	91.6667	0.925926	0.892857	0.892857	0.925926	0.909091	LDA25 FEB
LDA	48	0.5	0.709	93.3333	100	96.6667	0.964286	0.966667	0.964286	0.966667	0.965517	LDA20 FEB + VHD + FBCB + FNAL
LDA	36	0.857	0.998	80	50	65	1	1	1	1	1	LDA15 FEB + VHD + APDLC + FBCB + FTL + APDMC
LDA	24	0.999	0.921	3.33333	73.3333	38.3333	0	1	NaN	0.956522	0.956522	LDA10 APDMC + APDLC + FNAL
GLMB	240	0.639	0.815	90	90	90	0.962963	1	1	0.964286	0.981481	GLMB100 FEB + FVDN + VHD + MLD + MTD + FNAL + FBCB + APDLC + FML + FBP + APDMC
GLMB	228	0.664	0.818	90	93.3333	91.6667	0.962963	1	1	0.965517	0.981818	GLMB95 FEB + FVDN + VHD + FNAL + MTD + MLD + FBCB + FBP + APDLC + FML
GLMB	216	0.64	0.755	90	93.3333	91.6667	0.962963	1	1	0.965517	0.981818	GLMB90 FVDN + FEB + VHD + FNAL + MTD
GLMB	204	0.621	0.75	86.6667	96.6667	91.6667	0.961538	0.965517	0.961538	0.965517	0.963636	GLMB85 FEB + VHD + FVDN + FNAL + FBCB + MTD + MLD + FBP + APDLC + FTL + FML
GLMB	192	0.539	0.739	93.3333	96.6667	95	0.964286	0.965517	0.964286	0.965517	0.964912	GLMB80 FEB + VHD + FVDN + MTD + FNAL + FBP + MLD
GLMB	180	0.964	0.714	26.6667	93.3333	60	0.875	1	1	0.965517	0.972222	GLMB75 FVDN + FEB + VHD + MTD + FNAL + MLD
GLMB	168	0.741	0.802	80	93.3333	86.6667	0.958333	1	1	0.965517	0.980769	GLMB70 FEB + FVDN + VHD + MTD + FBCB + FNAL
GLMB	156	0.528	0.753	93.3333	96.6667	95	0.964286	0.965517	0.964286	0.965517	0.964912	GLMB65 FEB + FVDN + VHD + FNAL + FBCB + FBP + MTD + MLD + FTL + APDLC + APDMC + FBL
GLMB	144	0.575	0.725	93.3333	96.6667	95	0.964286	0.965517	0.964286	0.965517	0.964912	GLM60 all
GLMB	132	0.591	0.735	93.3333	96.6667	95	0.964286	0.965517	0.964286	0.965517	0.964912	GLM55 VHD + FVDN + FEB + MTD + FBCB + FNAL + MLD + FBP + APDLC + FBL + FTL + FML
GLMB	120	0.777	0.792	83.3333	93.3333	88.3333	0.96	1	1	0.965517	0.981132	GLM50 VHD + MTD + FVDN + FEB + FBCB + MLD + FNAL + FBP
GLMB	108	0.74	0.868	80	80	80	0.958333	1	1	0.96	0.979167	GLM45 FVDN + MTD + VHD + FEB + FBCB + MLD + FNAL + FBP + FBL + FML
GLMB	96	0.991	0.86	6.66667	73.3333	40	0.5	1	1	0.956522	0.958333	GLM40 FEB + FVDN + MTD + VHD + FNAL + FBCB + FBP + APDLC + MLD + APDMC + FBL + FML
GLMB	84	0.993	0.802	13.3333	90	51.6667	0.75	1	1	0.964286	0.967742	GLM35 FEB + MTD + VHD + FVDN + FBP + MLD + FNAL + APDLC + FBCB + FBL + FML
GLMB	72	0.618	0.861	83.3333	70	76.6667	1	0.952381	0.961538	1	0.978261	GLM30 FEB + VHD + FVDN + MTD + FNAL + APDLC + MLD + FBP + FBCB + APDMC + FBL
GLMB	60	0.73	0.735	86.6667	93.3333	90	0.923077	0.964286	0.96	0.931034	0.944444	GLM25 FEB + VHD + MTD
GLMB	48	0.519	0.572	100	100	100	0.9	0.966667	0.964286	0.90625	0.933333	GLM20 VHD + FEB + APDMC + MLD + FNAL + FBCB
GLMB	36	0.828	0.888	80	83.3333	81.6667	1	1	1	1	1	GLM15 VHD + FVDN + APDMC + FEB + MLD
GLMB	24	0.912	0.845	46.6667	80	63.3333	0.857143	1	1	0.923077	0.947368	GLM10 APDMC + MLD + FEB + MTD + VHD + FVDN
SVM	240	0.719	0.783	90	93.3333	91.6667	0.962963	1	1	0.965517	0.981818	SVM100 FEB + VHD + FVDN + FBCB + FNAL
SVM	228	0.705	0.753	86.6667	93.3333	90	0.961538	1	1	0.965517	0.981481	SVM95 FEB + VHD + FVDN + FBCB + FNAL
SVM	216	0.686	0.747	93.3333	90	91.6667	0.928571	1	1	0.931034	0.963636	SVM90 FEB + VHD + FVDN + FNAL + FBP + FBCB + APDLC + APDMC + FML + FTL + FBL + MLD
SVM	204	0.701	0.757	86.6667	96.6667	91.6667	0.961538	0.965517	0.961538	0.965517	0.963636	SVM85 FEB + VHD + FVDN + FBCB + FNAL + FBP
SVM	192	0.618	0.733	100	96.6667	98.3333	0.9	0.965517	0.964286	0.903226	0.932203	SVM80 FEB + VHD + FVDN + FBP + FNAL + FBCB + APDLC
SVM	180	0.605	0.694	96.6667	96.6667	96.6667	0.931034	0.965517	0.964286	0.933333	0.948276	SVM 75 FEB + VHD + FVDN + FNAL
SVM	168	0.707	0.776	83.3333	96.6667	90	0.96	0.965517	0.96	0.965517	0.962963	SVM 70 FEB + VHD + FVDN + FBCB + FBP
SVM	156	0.584	0.643	100	93.3333	96.6667	0.933333	0.964286	0.965517	0.931034	0.948276	SVM65 FEB + VHD + FVDN + FBP + FBCB + FNAL + APDLC + APDMC + FML + FBL + FTL
SVM	144	0.709	0.708	90	93.3333	91.6667	0.962963	1	1	0.965517	0.981818	SVM60 FEB + VHD + FVDN + FBCB + FNAL + FBP + APDLC + APDMC + FML + FTL + FBL + MLD
SVM	132	0.635	0.696	96.6667	100	98.3333	0.931034	0.966667	0.964286	0.935484	0.949153	SVM55 VHD + FEB + FVDN + FBCB + FNAL
SVM	120	0.675	0.804	86.6667	83.3333	85	0.961538	0.96	0.961538	0.96	0.960784	SVM50 FEB + VHD + FVDN + FBCB + FBP
SVM	108	0.685	0.779	90	86.6667	88.3333	0.962963	1	1	0.962963	0.981132	SVM45 FEB + VHD + FVDN + FBCB + FNAL + FBP + APDLC + FBL + FML + FTL + APDMC + MLD
SVM	96	0.754	0.791	86.6667	76.6667	81.6667	0.961538	1	1	0.958333	0.979592	SVM40 FEB + VHD + FVDN + FNAL + FBP + FBCB + APDLC + APDMC + FBL + FML + FTL + MLD
SVM	84	0.996	0.821	0	70	35	NA	1	NA	NA	1	SVM35 FEB + VHD + FBP + FVDN
SVM	72	0.633	0.956	90	53.3333	71.6667	1	0.9375	0.964286	1	0.976744	SVM30 FEB + VHD + FVDN + APDLC + FBP
SVM	60	0.624	0.81	90	93.3333	91.6667	0.925926	0.892857	0.892857	0.925926	0.909091	SVM25 FEB
SVM	48	0.536	0.612	96.6667	100	98.3333	0.931034	0.966667	0.964286	0.935484	0.949153	SVM20 FEB + VHD + FBCB + FNAL + APDLC
SVM	36	0.614	0.847	76.6667	76.6667	76.6667	1	1	1	1	1	SVM15 FEB + VHD + APDLC + FBCB + FTL + APDMC + FNAL + FML
SVM	24	0.66	0.942	56.6667	10	33.3333	1	1	1	1	1	SVM10 APDMC + APDLC + FNAL + FEB + FTL + FML + FBL + FBP
